# Supplementary material for: Evaluation of Coproporphyrins I and III as an Endogenous Marker for Hepatic Organic Anion Transporting Polypeptides and Multidrug Resistance-Associated Proteins (MRP 2/3) Activity in Animal Models of Nonalcoholic Steatohepatitis Using a Mechanistic Model
Source: Preprints.org preprint supplement (doi:10.20944/preprints202309.0208.v1), 2023-09-05
Supplement: Supplementary file 1 [file supplementary]

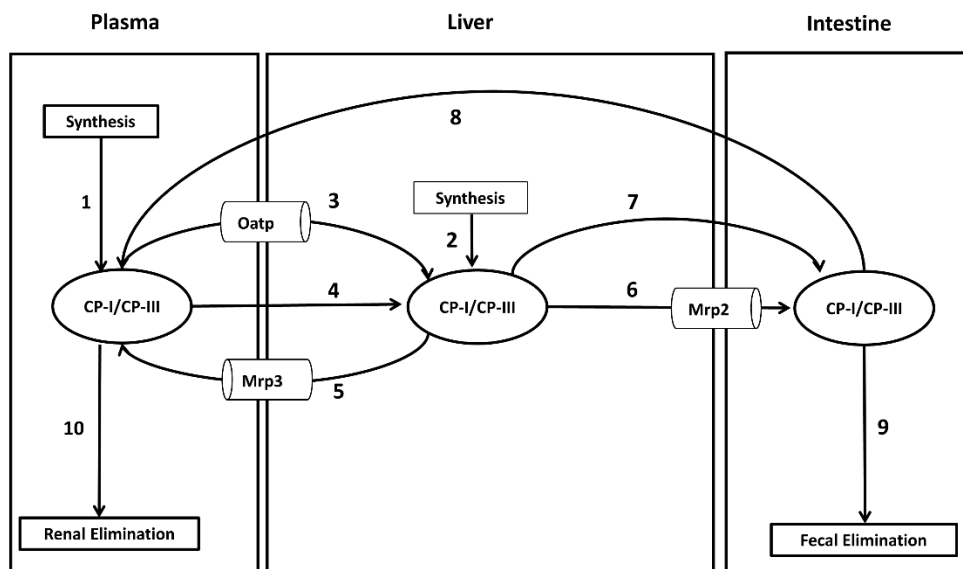

**Figure S1: Schematic diagram of Coproporphyrin (CP) model in rat and mouse.** The model includes three compartments – Plasma, Liver, and Intestine. The numbers represent the processes that are modeled for CP metabolism. 1, Synthesis of CP-I/III from erythrocytes. 2, Hepatic synthesis of CP-I/III 3, Oatp-mediated transport of CP-I/III from plasma to liver. 4, Diffusion-mediated transport of CP-I/III from plasma to liver. 5, Mrp3 mediated transport of CP-I/III from liver to plasma. 6, Mrp2 mediated CP-I/III transport from the liver to the intestine. 7, Non-Mrp2 mediated CP-I/III transport from liver to plasma. 8, Enterohepatic circulation of CP-I/CP-III from intestine to plasma 9, Fecal elimination of CP-I/CP-III. 10, Renal elimination of CP-I/CP-III.

**Table S1. Key model parameters used in rat and mouse CP models.**

| Parameter Name          | Description                          | Value (Rat model) | Value (Mouse model) | Unit          | Reference |
|-------------------------|--------------------------------------|-------------------|---------------------|---------------|-----------|
| $k_{m,Oatp,CP-I}$       | Affinity constant of CP-I for Oatp   | 1.66              | 1.66                | $\mu\text{M}$ | [9]       |
| $k_{m,Mrp2,CP-I}$       | Affinity constant of CP-I for Mrp2   | 7.7               | 7.7                 | $\mu\text{M}$ | [10]      |
| $k_{m,Mrp3,CP-I}$       | Affinity constant of CP-I for Mrp3   | 3.75              | 3.75                | $\mu\text{M}$ | [11]      |
| $k_{m,Oatp,CP-III}$     | Affinity constant of CP-III for Oatp | 2.44              | 2.44                | $\mu\text{M}$ | [9]       |
| $k_{m,Mrp2,CP-III}$     | Affinity constant of CP-III for Mrp2 | 7.7               | 7.7                 | $\mu\text{M}$ | [10]      |
| $k_{m,Mrp3,CP-III}$     | Affinity constant of CP-III for Mrp3 | 3.75              | 3.75                | $\mu\text{M}$ | [11]      |
| $v_{CP-I,Syn}$          | CP-I extrahepaic synthesis rate      | 0.166             | 0.0229              | nM/min        | Computed  |
| $v_{CP-I,hepaticSyn}$   | CP-I hepatic synthesis rate          | 0.032             | 0.0077              | nM/min        | Computed  |
| $v_{CP-III,Syn}$        | CP-III extra hepatic Synthesis rate  | 0.896             | 0.0785              | nM/min        | Computed  |
| $v_{CP-III,hepaticSyn}$ | CP-III hepatic synthesis rate        | 0.175             | 0.0263              | nM/min        | Computed  |
| Liver volume            | Volume of liver                      | 0.01              | 0.0018              | Litre         | [34]      |
| Plasma volume           | Volume of plasma                     | 0.007             | 0.002               | Litre         | [34]      |
| Intestinal volume       | Volume of intestine                  | 0.011             | 0.002               | Litre         | [34]      |

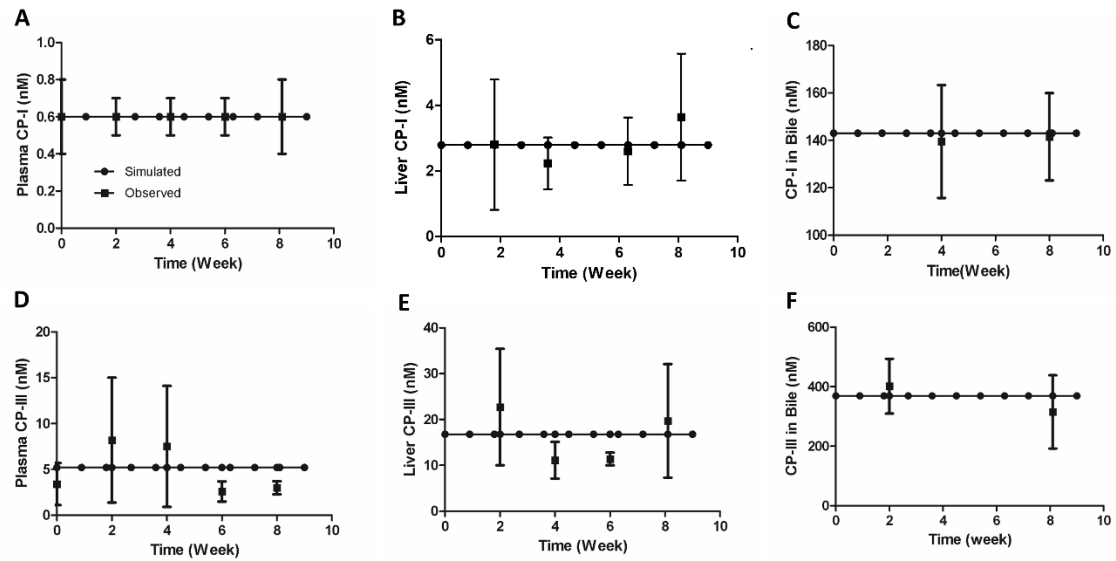

**Figure S2: Comparison of model simulated steady states with observed data. (A) Plasma CP-I, (B) Liver CP-I, (C) CP-I in bile, (D) Plasma CP-III, (E) Liver CP-III, (F) CP-III in Bile.**

Symbols, the continuous line represents simulated data. Experimental data with error bars (mean  $\pm$  SEM) represent observed data. CP-I, Coproporphyrin-I; CP-III, Coproporphyrin-III

**Table S2: Model simulated steady states values in mice compared with observed result.**

| <b>Model Variables</b>                  | <b>Simulation</b> | <b>Observed [15]</b> |
|-----------------------------------------|-------------------|----------------------|
| Plasma CP-I (nM)                        | 0.14              | 0.14±0.02            |
| Plasma CP-III (nM)                      | 0.57              | 0.57±0.1             |
| Liver CP-I (nM)                         | 0.6               | NA                   |
| Liver CP-III (nM)                       | 1.57              | NA                   |
| Bile CP-I (nM)                          | 32                | NA                   |
| Bile CP-III (nM)                        | 43                | NA                   |
| CP-I urinary secretion<br>(nmol/h/kg)   | 0.012             | 0.0123±0.001         |
| CP-III urinary secretion<br>(nmol/h/kg) | 0.034             | 0.034±0.006          |

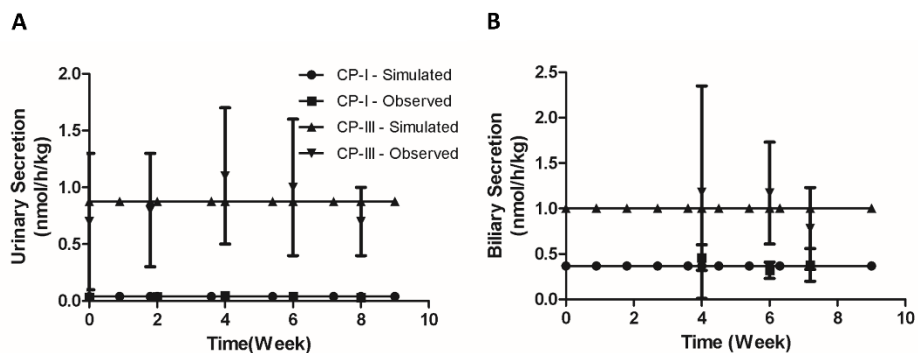

**Figure S3: Comparison of model simulated renal and biliary secretion with observed data. (A) CP-I and CP-III urinary secretion (B) CP-I and CP-III biliary secretion.**

Symbols, continuous line represents simulated data. Experimental data with error bars (mean  $\pm$  SEM) represent observed data. CP-I, Coproporphyrin-I; CP-III, Coproporphyrin-III

**Table S3: Model simulated biliary excretion ratio (CP-III/CP-I) with an intravenous infusion with the same and different proportions of CP-I and CP-III.**

| CP-I infusion rate (µg/h) | CP-III infusion rate (µg/h) | Simulation | Observed [31] |
|---------------------------|-----------------------------|------------|---------------|
| 60                        | 60                          | 2.5        | 2             |
| 30                        | 60                          | 1.5        | 1             |
| 60                        | 30                          | 4.6        | 4.2           |

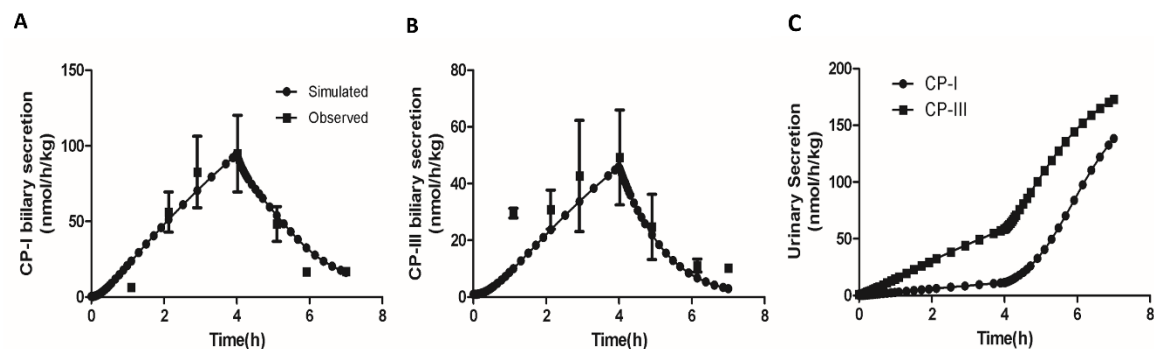

**Figure S4 : Model simulation showing the effect of concomitant infusion of bromosulphophthalein (BSP) with equal amounts of CP-I and CP-III. (A) CP-I biliary secretion (B) CP-III biliary secretion, (C) CP-I, and CP-III biliary secretion.** Data was extracted using the WebPlotDigitizer tool (URL: <https://apps.automeris.io/wpd/> ). Experimental data [30] with error bars (mean  $\pm$  SD) represent observed data. CP-I, Coproporphyrin-I ; CP-III, Coproporphyrin-III

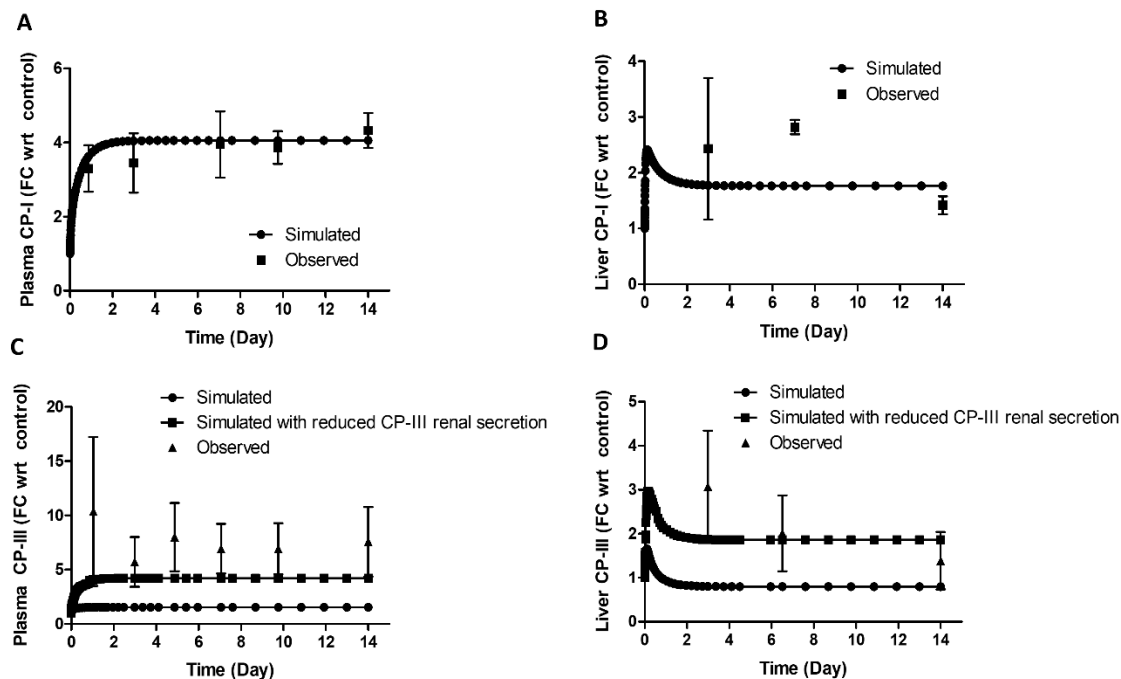

**Figure S5: Comparison of model simulated plasma and liver CP-I and CP-III and with observed data in BDL rat. (A) Plasma CP-I, (B) Liver CP-I, (C) Plasma CP-III, (D) Liver CP-III.** Symbols, continuous line represents simulated data. Data was extracted using the WebPlotDigitizer tool (URL: <https://apps.automeris.io/wpd/>) Experimental data [11] with error bars (mean  $\pm$  SEM) represent observed data. CP-I, Coproporphyrin-I; CP-III, Coproporphyrin-III, FC wrt control, Fold change with respect to control



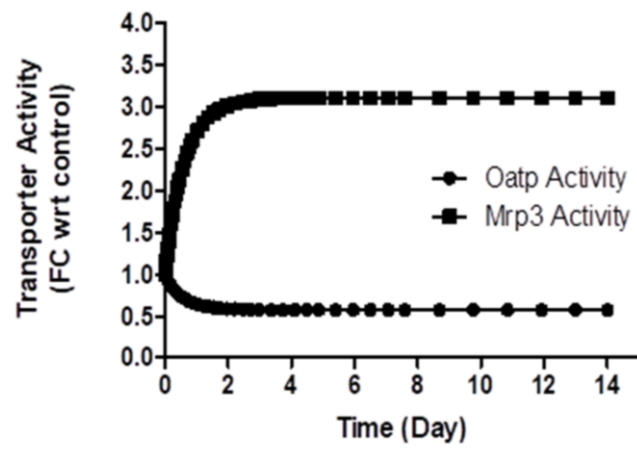

**Figure S6: Model simulated change in transporter activity during bile-duct ligation (BDL) in rat.**  
Symbol, FC wrt control, Fold change with respect to control.

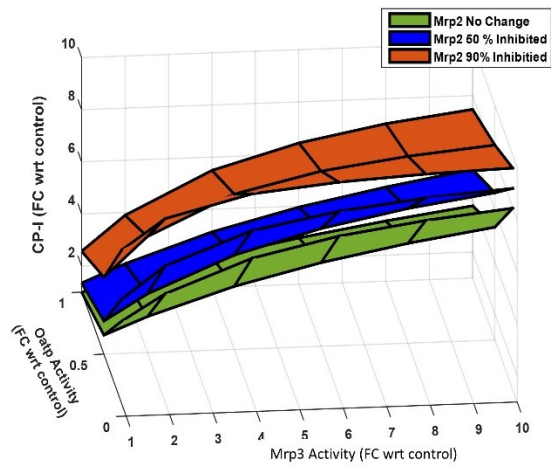

**Figure S7: Steady-state continuation analysis showing the impact of different transporters (Oatp, Mrp3, and Mrp2) on plasma CP-I level.** Symbol, FC wrt control, Fold change with respect to control.

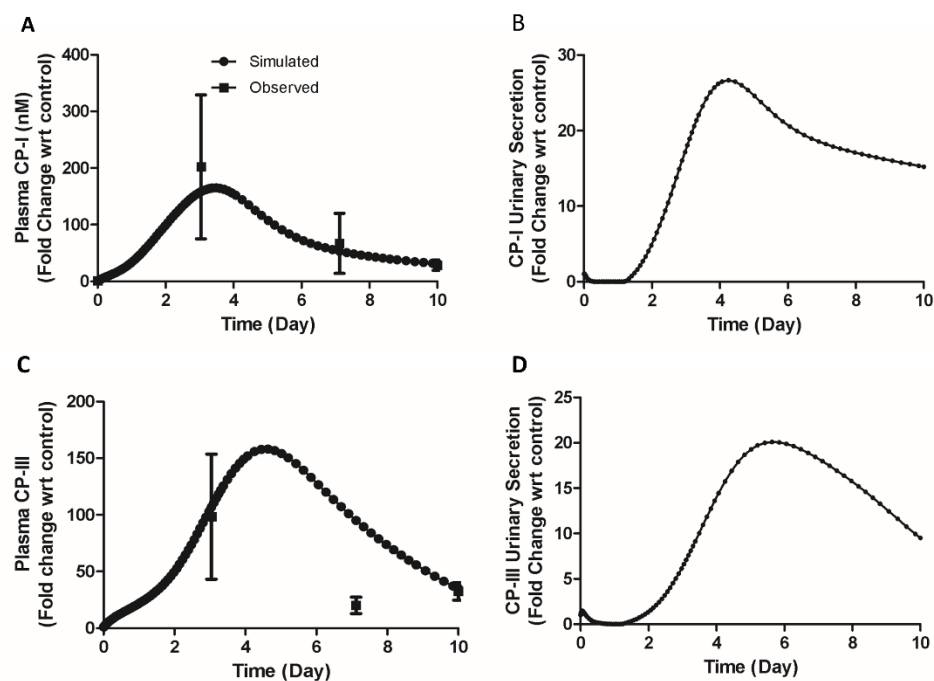

**Figure S8: Comparison of model simulated plasma CP-I and CP-III with observed data and simulated biliary secretion CP-I and CP-III. (A) Plasma CP-I, (B) CP-I urinary secretion, (C) Plasma CP-III, (D) CP-III urinary secretion.** Symbols, continuous line represents simulated data. Experimental data [11] with error bars (mean  $\pm$  SEM) represent observed data. CP-I, Coproporphyrin-I; CP-III, Coproporphyrin-III

**Table S4: Model simulation results of CP-I and CP-III disposition in Oatp KO mice; \* Simulations done with increased hepatic CP-III synthesis**

| Model Variables                         | Simulation A | Simulation B* | Observed [15] |
|-----------------------------------------|--------------|---------------|---------------|
| Plasma CP-I (nM)                        | 1.01         | 1.01          | 0.98±0.03     |
| Plasma CP-III (nM)                      | 5.30         | 8.84          | 8.76±0.92     |
| CP-I urinary secretion<br>(nmol/h/kg)   | 0.08         | 0.08          | 0.15±0.05     |
| CP-III urinary secretion<br>(nmol/h/kg) | 0.25         | 0.43          | 0.61±0.17     |

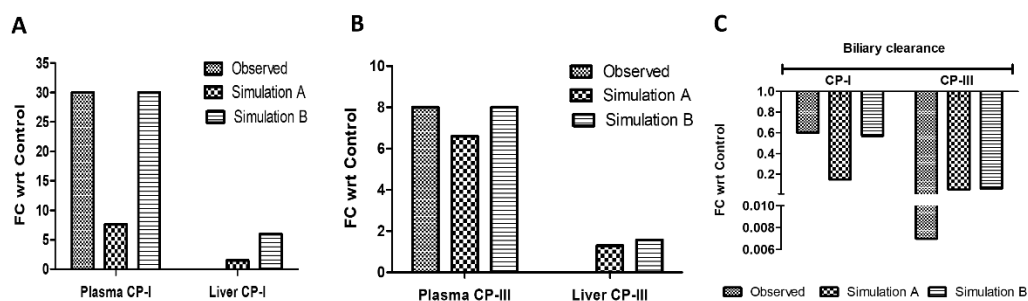

**Figure S9: Comparison of model-simulated and observed data in TR- rats. [33]. Simulation details are given in the manuscript. (A) Plasma CP-I and Liver CP-I, (B) Plasma CP-III, (C) CP-I and CP-III biliary secretion. FC, fold change; CP-I, Coproporphyrin-I ; CP-III, Coproporphyrin-III**
